# Viral integration transforms chromatin to drive oncogenesis

Mehran Karimzadeh (ORCID: [0000-0002-7324-6074](#))<sup>1,2,3</sup>,  
 Christopher Arlidge (ORCID: [0000-0001-9454-8541](#))<sup>2</sup>,  
 Ariana Rostami (ORCID: [0000-0002-3423-8303](#))<sup>1,2</sup>,  
 Mathieu Lupien (ORCID: [0000-0003-0929-9478](#))<sup>1,2,5</sup>,  
 Scott V. Bratman (ORCID: [0000-0001-8610-4908](#))<sup>1,2,5</sup>, and  
 Michael M. Hoffman (ORCID: [0000-0002-4517-1562](#))<sup>1,2,3,4,5</sup>

<sup>1</sup>Department of Medical Biophysics, University of Toronto, Toronto, ON, Canada

<sup>2</sup>Princess Margaret Cancer Centre, Toronto, ON, Canada

<sup>3</sup>Vector Institute, Toronto, ON, Canada

<sup>4</sup>Department of Computer Science, University of Toronto, Toronto, ON, Canada

<sup>5</sup>Lead contact: [michael.hoffman@utoronto.ca](mailto:michael.hoffman@utoronto.ca), [scott.bratman@rmp.uhn.ca](mailto:scott.bratman@rmp.uhn.ca),  
[mathieu.lupien@uhnresearch.ca](mailto:mathieu.lupien@uhnresearch.ca)

February 12, 2020

## Abstract

Human papillomavirus (HPV) drives almost all cervical cancers and up to ~70% of head and neck cancers. Frequent integration into the host genome occurs only for tumourigenic strains of HPV. We hypothesized that changes in the epigenome and transcriptome contribute to the tumourigenicity of HPV. We found that viral integration events often occurred along with changes in chromatin state and expression of genes near the integration site. We investigated whether introduction of new transcription factor binding sites due to HPV integration could invoke these changes. Some regions within the HPV genome, particularly the position of a conserved CTCF sequence motif, showed enriched chromatin accessibility signal. ChIP-seq revealed that the conserved CTCF sequence motif within the integrated HPV genome bound CTCF in 5 HPV<sup>+</sup> cancer cell lines. Significant changes in CTCF binding pattern and increases in chromatin accessibility occurred exclusively within 100 kbp of HPV integration sites. The chromatin changes co-occurred with out-sized changes in transcription and alternative splicing of local genes. We analyzed the essentiality of genes upregulated around HPV integration sites of The Cancer Genome Atlas (TCGA) HPV<sup>+</sup> tumours. HPV integration upregulated genes which had significantly higher essentiality scores compared to randomly selected upregulated genes from the same tumours. Our results suggest that introduction of a new CTCF binding site due to HPV integration reorganizes chromatin and upregulates genes essential for tumour viability in some HPV<sup>+</sup> tumours. These findings emphasize a newly recognized role of HPV integration in oncogenesis.

## 1 Introduction

HPVs induce epithelial lesions ranging from warts to metastatic tumours<sup>1</sup>. Of the more than 200 characterized HPV strains<sup>2</sup>, most share a common gene architecture<sup>3</sup>. As the most well-recognized HPV oncoproteins, E6 and E7 are essential for tumourigenesis in some HPV<sup>+</sup> tumour models<sup>4,5,6</sup>.

Beyond the oncogenic pathways driven by E6 and E7, emerging evidence suggests that high-risk HPV strains play an important role in epigenomic regulation of tumourigenesis. These strains have a conserved sequence motif for the CTCF transcription factor<sup>7</sup>. CTCF binds to the episomal (circular and non-integrated) HPV at the position of this sequence motif and regulates the expression of E6 and E7<sup>7</sup>. CTCF and YY1 interact by forming a loop which represses the expression of E6 and E7 in episomal HPV<sup>8</sup>. HPV integration may disrupt this loop and thereby lead to upregulated E6 and E7. While over 80% of HPV<sup>+</sup> invasive cancers have integrated forms of HPV, benign papillomas usually have episomal HPV<sup>3</sup>.

CTCF has well-established roles in regulating the 3D conformation of the human genome<sup>9</sup>. CTCF binding sites mark the boundaries of topological domains by blocking loop extrusion through the cohesin complex<sup>10</sup>. Mutations disrupting CTCF binding sites reorganize chromatin, potentially enabling tumourigenesis<sup>11,12,13</sup>. Introduction of a new CTCF binding site by HPV integration could have oncogenic reverberations beyond the expression of E6 and E7 transcription, by affecting chromatin organization. Here, we investigate this scenario—examining how HPV integration in tumours results in local changes in gene expression and alternative splicing—and propose new pathways to tumourigenesis driven by these changes.

## 2 Results

### 2.1 CTCF binds a conserved sequence motif in the host-integrated HPV

#### 2.1.1 A specific CTCF sequence motif occurs more frequently in tumourigenic HPV strains than any other motif

We searched tumourigenic HPV strains' genomes for conserved transcription factor sequence motifs. Specifically, we examined 18 HPV strains in TCGA head and neck squamous cell carcinoma (HNSC)<sup>17</sup> and cervical squamous cell carcinoma (CESC)<sup>18</sup> datasets. In each strain's genome, we calculated the enrichment of 518 JASPAR<sup>16</sup> transcription factor motifs (Figure 1a). To control false discovery rate over multiple comparisons, we used the Benjamini-Hochberg procedure<sup>19</sup> to attain  $q$ -values<sup>20</sup>. ZNF263 and CTCF motifs were enriched at the same genomic regions within several tumourigenic strains ( $q < 0.05$ ). The CTCF sequence motif at position 2,916 of HPV16, however, occurred in the highest number of HPV strains (10/18 strains) compared to any other sequence motif (Figure 1a). This position also overlapped with ATAC-seq reads mapped to HPV16 in TCGA-BA-A4IH (Figure 1a). The HPV16 match's sequence **TGGCACCACCTTGGTGGTTA** closely resembled the consensus CTCF binding sequence<sup>16</sup>, excepting two nucleotides written in bold ( $p = 0.00001$ ;  $q = 0.21$ ).

#### 2.1.2 CTCF binds its conserved sequence motif in host-integrated HPV16

To test the function of the conserved CTCF motif in host-integrated HPV16, we performed ATAC-seq, CTCF ChIP-seq, and RNA-seq on 5 HPV16<sup>+</sup> cell lines: 93-VU147T<sup>21</sup> (7 integration sites), Caski<sup>22</sup> (6 integration sites), HMS-001<sup>23</sup> (1 integration site), SCC-090<sup>24</sup> (1 integration site), and SiHa<sup>25</sup> (2 integration sites). In each cell line, the strongest CTCF ChIP-seq peak of the HPV genome aligned to the conserved CTCF sequence motif described above (Figure 1b, right).

The presence of both episomal and host-integrated HPV complicates the interpretation of HPV genomic signals. SiHa, however, does not contain episomal HPV<sup>26,27</sup>. All of the ATAC-seq and RNA-seq SiHa fragments mapping to the integration site close to the conserved CTCF motif (HPV16:3,131), also partially mapped to chr13:73,503,424. This also occurred for 3 of the 21 unpaired CTCF ChIP-seq reads mapping to HPV16:3,131. In agreement with previous reports<sup>26,27</sup>, these

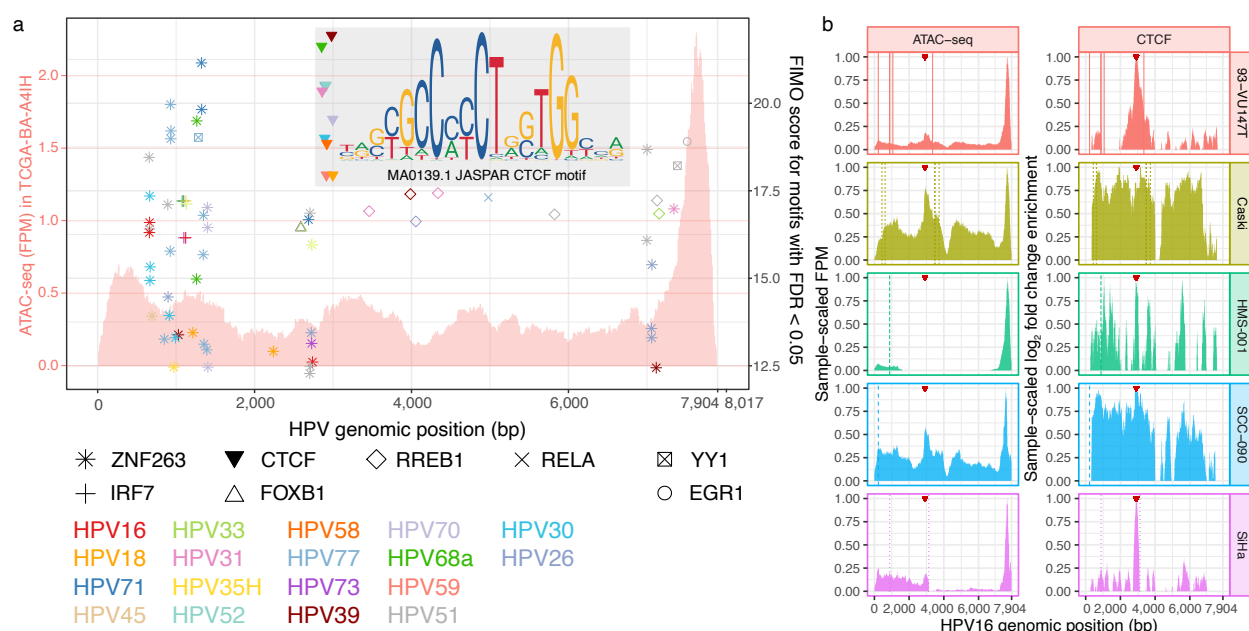

**Figure 1: CTCF binds to its conserved sequence motif in HPV.** (a) Chromatin accessibility and transcription factor motif enrichment within the HPV genome. Horizontal axis: HPV genomic position (7904 bp for HPV16 and 8017 bp for the longest HPV genome among the 18). Peach signal: ATAC-seq MACS2 FPM within the HPV16 genome in TCGA-BA-A4IH. Points: FIMO<sup>14</sup> enrichment scores of sequence motif matches ( $q < 0.05$ ); symbols: motifs; colors: HPV strains. Gray area: all shown matches for the CTCF motif and its sequence logo<sup>15</sup>. We showed the logo for the reverse complement of the JASPAR<sup>16</sup> CTCF motif (MA0139.1) to emphasize the CCCTC consensus sequence. (b) ATAC-seq MACS2 FPM (left) and CTCF ChIP-seq sample-scaled MACS2 log<sub>2</sub> fold enrichment over the HPV16 genome (right) for 5 cell lines. To indicate no binding for regions with negative CTCF ChIP-seq log<sub>2</sub> fold enrichment signal, we showed them as 0. Red triangle: position of the conserved CTCF sequence motif in HPV16. Dashed lines: HPV integration sites in each of the 5 cell lines 93-VU147T (orange), Caski (moss), HMS-001 (green), SCC-090 (blue), and SiHa (pink).

results suggest that the SiHa signal comes from the host-integrated HPV and that CTCF binding persists after HPV integration.

In 4 out of the 5 cell lines, the second-strongest chromatin accessibility peak aligned to both the CTCF sequence motif and the CTCF ChIP-seq peak (Figure 1b, left). HMS-001, where HPV integrates into the host genome incompletely<sup>23</sup>, provided the lone exception. In HMS-001, regions of HPV that did not integrate into the host lacked signal from ATAC-seq, which specifically excludes non-chromatinized DNA (Figure 1b, left). Since ChIP-seq includes chromatinized as well as non-chromatinized DNA, the HMS-001 CTCF ChIP-seq signal without associated ATAC-seq signal indicated that CTCF bound to episomal HPV (Figure 1b). Other CTCF peaks in HMS-001 (HPV16:7,750 and HPV16:31) overlap ATAC-seq peaks and may correspond to partially host-integrated HPV.

## 2.2 HPV integration dysregulates chromatin accessibility and transcription

### 2.2.1 HPV dysregulates the local chromatin and transcriptome of TCGA-BA-A4IH tumour

Integration of HPV into the host genome generates *chimeric* sequences which partially map to the host genome and partially map to the virus genome. We characterized high-confidence HPV integration sites containing chimeric sequences (subsection 4.7). Of the TCGA HNSC patients, 9 have matched RNA-seq and ATAC-seq data<sup>28</sup>. Using the RNA-seq data, we identified an HPV integration site in TCGA-BA-A4IH at chr9:99,952,156. The transcriptome and chromatin accessibility of this patient differed greatly from the other 8 patients at the HPV integration site (Figure 2). The other 8 patients lacked transcription (RPM < 1) or chromatin accessibility (FPM < 0.2) within 5 kbp of the integration site. TCGA-BA-A4IH, however, exhibited both active transcription and open chromatin (Figure 2a). In fact, TCGA-BA-A4IH's chromatin accessibility and RNA expression exceeded the other 8 patients up to 400 kbp beyond the integration site (Figure 2b). Within those bounds, TCGA-BA-A4IH's chromatin accessibility peaks often had signal exceeding that of all 8 other patients (Figure 2c).

### 2.2.2 HPV dysregulates local chromatin and transcriptome in HPV<sup>+</sup> cell lines

To investigate the generalizability of dysregulated chromatin and transcriptome in TCGA-BA-A4IH, we conducted a similar analysis on 5 HPV<sup>+</sup> lines. For each HPV integration site, we compared the cell line with integrated HPV to the other 4 cell lines without HPV at that genomic position. Only the cell line with HPV integration displayed strong expression of nearby genes (Figure 3a, top).

For each viral integration site, expression of the chimeric transcript occurred either only downstream (for 3 of the integration sites of 93-VU147T and 2 of the integration sites of Caski) or only upstream (the other 12 integration sites), never in both directions (Figure 2a). Directional chimeric transcription suggests that only one end of the integrated virus drove expression that continued past the integration site into the host genome.

Since we identified the integration site by detecting chimeric transcripts in RNA-seq data, we expected to observe transcription of the host genome at the site of viral integration. Nevertheless,

Figure 2: (*Next page*). **HPV integration alters the local transcriptome and epigenome.** (a) A 10 kbp genomic window centered on TCGA-BA-A4IH's HPV integration site. RNA expression in RPM (left); chromatin accessibility in FPM (right). Red: signal from TCGA-BA-A4IH; blue: signal from each of the 8 other HNSC samples. Vertical dashed red line: integration site. (b) Same data as (a), but in an expanded 1 Mbp genomic window. The green background shows how the coordinates of (a) fit in (b). The purple vertical bars show position of all ATAC-seq peaks found in any of the 9 tumour samples. (c) (*Top*): Mapping of genomic positions for peaks with outlier signal in TCGA-BA-A4IH (gray), the position of the HPV integration site (red), and each 250,000 bp tick mark to ATAC-seq peaks. Gray diagonal lines map each 250,000 bp to the corresponding peaks. The black lines map the genomic position of the top 9 peaks with the strongest FPM in any of the 9 samples to the corresponding peaks. (*Middle*): Heatmap of ATAC-seq peaks in the same 1 Mbp genomic window. Colour indicates ATAC-seq FPM divided by the maximum FPM value of chr9 in each patient (see subsection 4.4.2). Each column shows a 200 bp genomic window overlapping a peak in any of the 9 patients. We showed all 200 bp genomic windows with sliding windows of 50 bp if the window overlaps a peak. (*Bottom*): Difference of the values in TCGA-BA-A4IH and the most extreme value in the other 8 patients when TCGA-BA-A4IH had the most extreme value among the 9 patients. We used white when it was not the most extreme value.

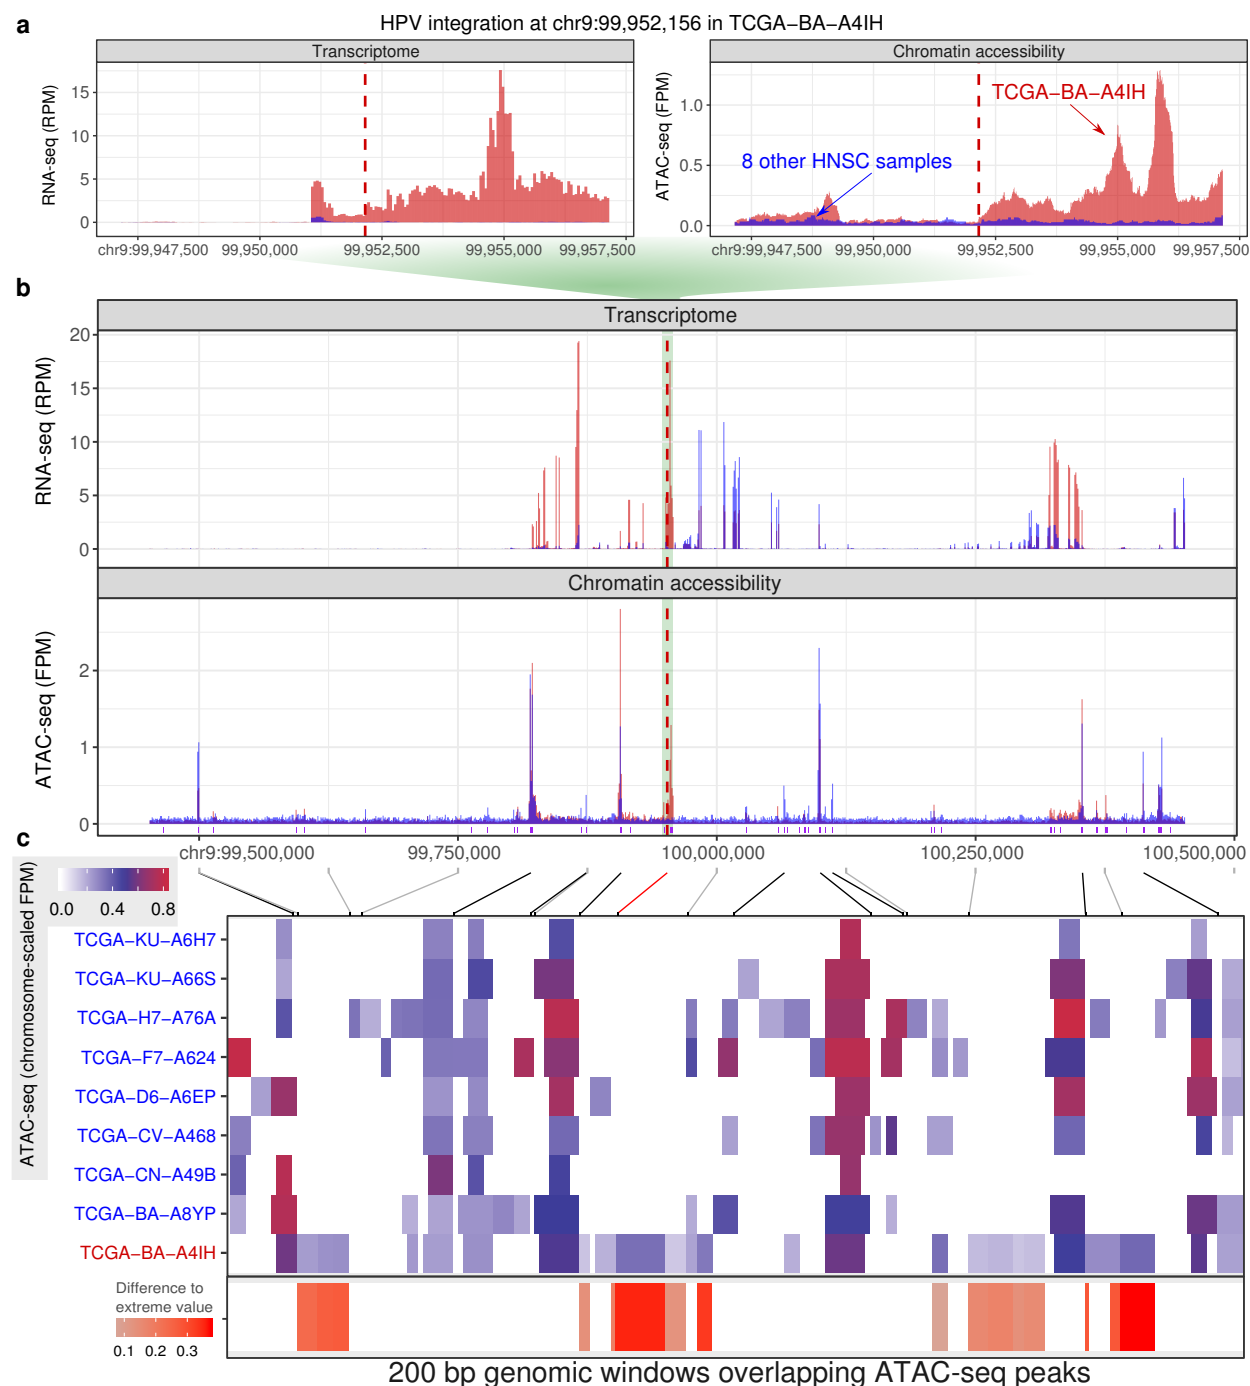

transcription of these regions necessitates an active viral-dependent mechanism, as they are not transcribed in HPV<sup>-</sup> cell types (Figure 3a, top). Among all HPV integration sites, expression of the viral-host chimera co-occurred with chromatin accessibility signal (Figure 3a, middle). The overlap of transcription and chromatin accessibility suggests that viral integration introduces *cis*-regulatory elements which actively transcribe the viral-host chimera. The consistent recruitment of CTCF at HPV integration sites in 5 different cell lines and altered CTCF binding around integration sites suggest that CTCF plays a role in integration-dependent HPV tumorigenesis (Figure 3a, bottom).

To understand the spatial effect of HPV integration on chromatin, we examined CTCF ChIP-seq and chromatin accessibility peaks in HMS-001 within 500 kbp of its chr20:47,031,760 integration site (Figure 3b–c). Some of the regions of inaccessible chromatin in 93-VU147T, Caski, SCC-090, and SiHa are accessible in HMS-001 within 400 kbp of this integration site. In most of these regions, HMS-001 had more accessible chromatin compared to any of the other 4 cell lines (Figure 3b, middle). For CTCF, however, some genomic regions showed enrichment and other genomic regions showed depletion in CTCF binding (Figure 3c).

## 2.3 Integration of HPV dysregulates expression and alternative splicing of local genes

### 2.3.1 HPV integration alters gene expression

To determine whether HPV integration significantly changed gene expression, we examined changes in transcription of individual genes. We used two criteria to identify outlier changes in gene expression which occurred due to HPV integration. First, we calculated expression fold change dividing  $\log_2$  TPM in the sample with HPV integrated at some locus ( $\text{TPM}_{\text{HPV}+}$ ) by median TPM in samples without HPV integrated at that locus ( $\langle \text{TPM}_{\text{other}} \rangle$ ). For an HPV<sup>+</sup> cell line, we only considered a gene an outlier if its expression fold change exceeded 2. This meant a  $\log_2$  fold change greater than 1:

$$\left| \log_2 \frac{\text{TPM}_{\text{HPV}+}}{\langle \text{TPM}_{\text{other}} \rangle} \right| > 1. \quad (1)$$

Fold change measurement, however, does not reflect dispersion in the expression of each gene. Second, therefore, we also required the difference in TPM to exceed at least twice the standard deviation (SD) of TPM of that gene in other cell lines:

$$|\text{TPM}_{\text{HPV}+} - \langle \text{TPM}_{\text{other}} \rangle| > 2\text{SD} \quad (2)$$

Out of the 17 HPV integration sites, 10 had upregulated genes only (expression fold change > 2), 3 had downregulated genes only (expression fold change < -2), and 1 (chr17:38,267,231 of 93-VU147T) had both upregulated and downregulated genes (Figure 4a, middle).

### 2.3.2 HPV integration sites alter gene splicing

Our results suggested that HPV integration increases chromatin accessibility and alters CTCF binding. Since chromatin-binding proteins, including CTCF, can modify gene splicing<sup>29</sup>, we investigated whether HPV integration affects alternative splicing of nearby genes.

We quantified how the expression of each exon varies independent of the global expression of that gene (see subsection 4.2.2)<sup>30</sup>. For outlier exon expression, we again used a criterion of expression fold change > 2 compared to other cell lines:

$$\left| \log_2 \frac{\text{exon count}_{\text{HPV}}}{\langle \text{exon count}_{\text{other}} \rangle} \right| > 1. \quad (3)$$



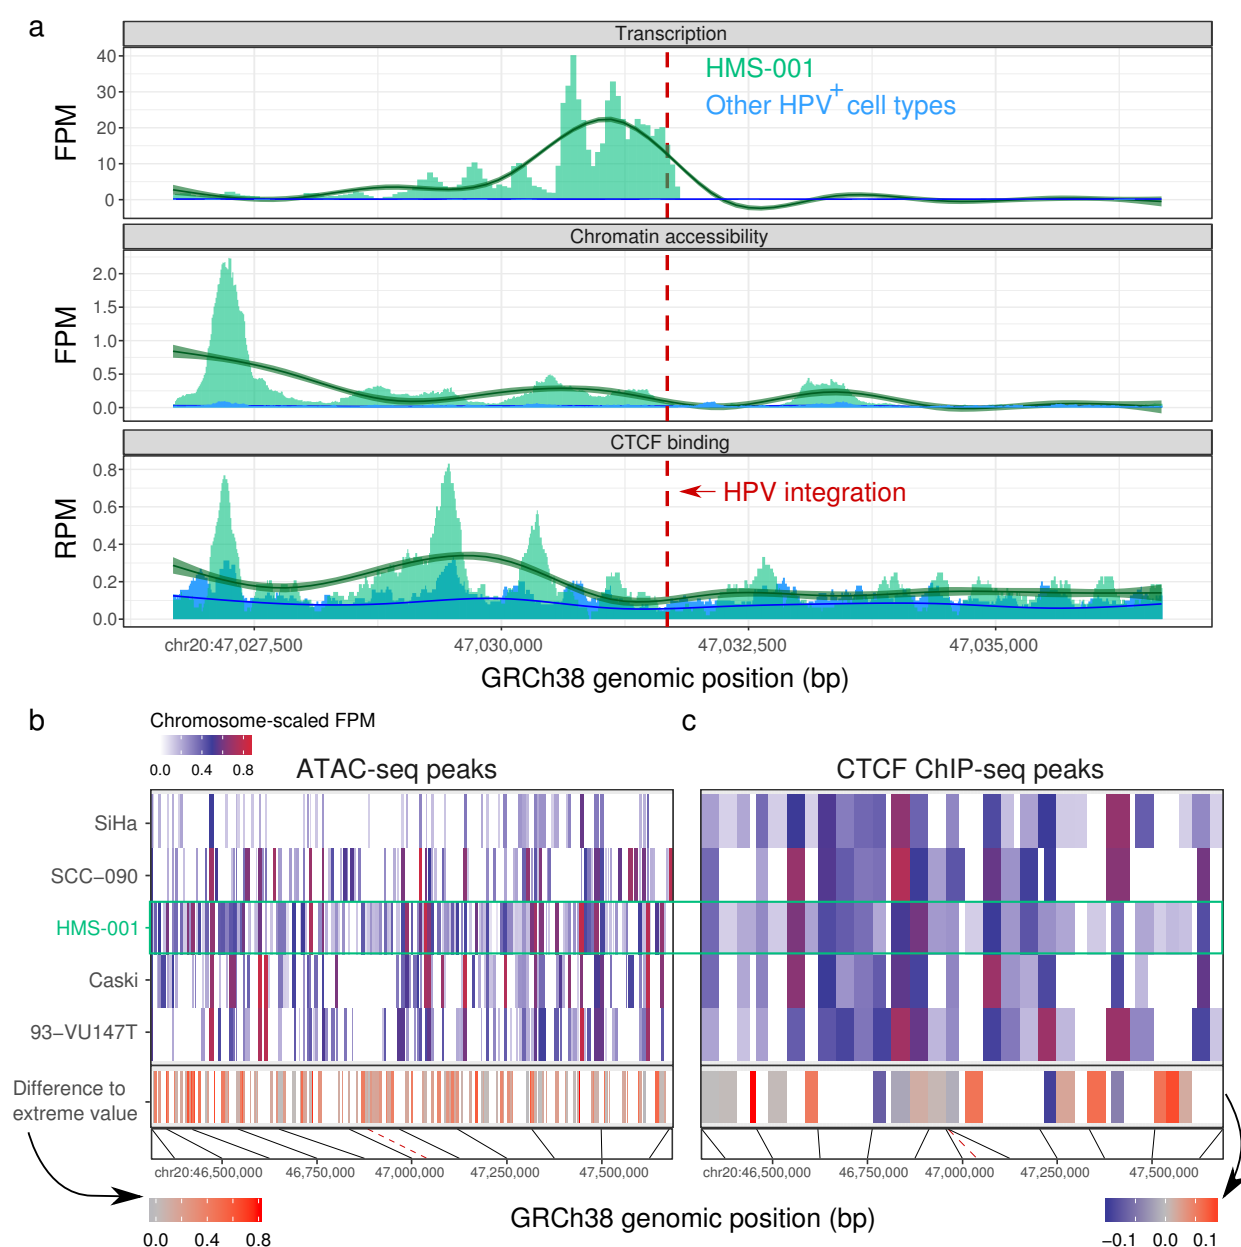

**Figure 3: HPV integration disrupts local host epigenome and transcriptome.** (a) Genomic assay signal for HMS-001's only HPV integration site (chr20:47,031,760). Top: RNA expression RPM; middle: ATAC-seq FPM; bottom: CTCF ChIP-seq FPM. Green bars: signal from HMS-001; blue bars: signal from 4 other HPV<sup>+</sup> cell lines without integration at this position. Curves: smoothing of HMS-001 (green) and the 4 other cell lines (blue) using a generalized additive model. Red dashed line: HPV integration site. (b) ATAC-seq peaks in a 1 Mbp window centered on HMS-001's integration site. Each column shows a 200 bp genomic window overlapping a peak. We generated all 200 bp genomic windows with a stride of 50 bp which overlapped a peak in any of the 5 cell lines. (Top): ATAC-seq signal for each cell line in FPM divided by the maximum FPM of chromosome 20. (Middle): Difference in the epigenome of HMS-001 and the most extreme value in the other 4 cell lines when HMS-001 had the most extreme value among the cell lines. When HMS-001 did not have the most extreme value, we used white. (Bottom): Physical location of peaks. Black lines map every 125,000 bp to the corresponding peak. Red dashed line: HPV integration site. (c) Similar to (b), but for CTCF ChIP-seq instead of ATAC-seq.

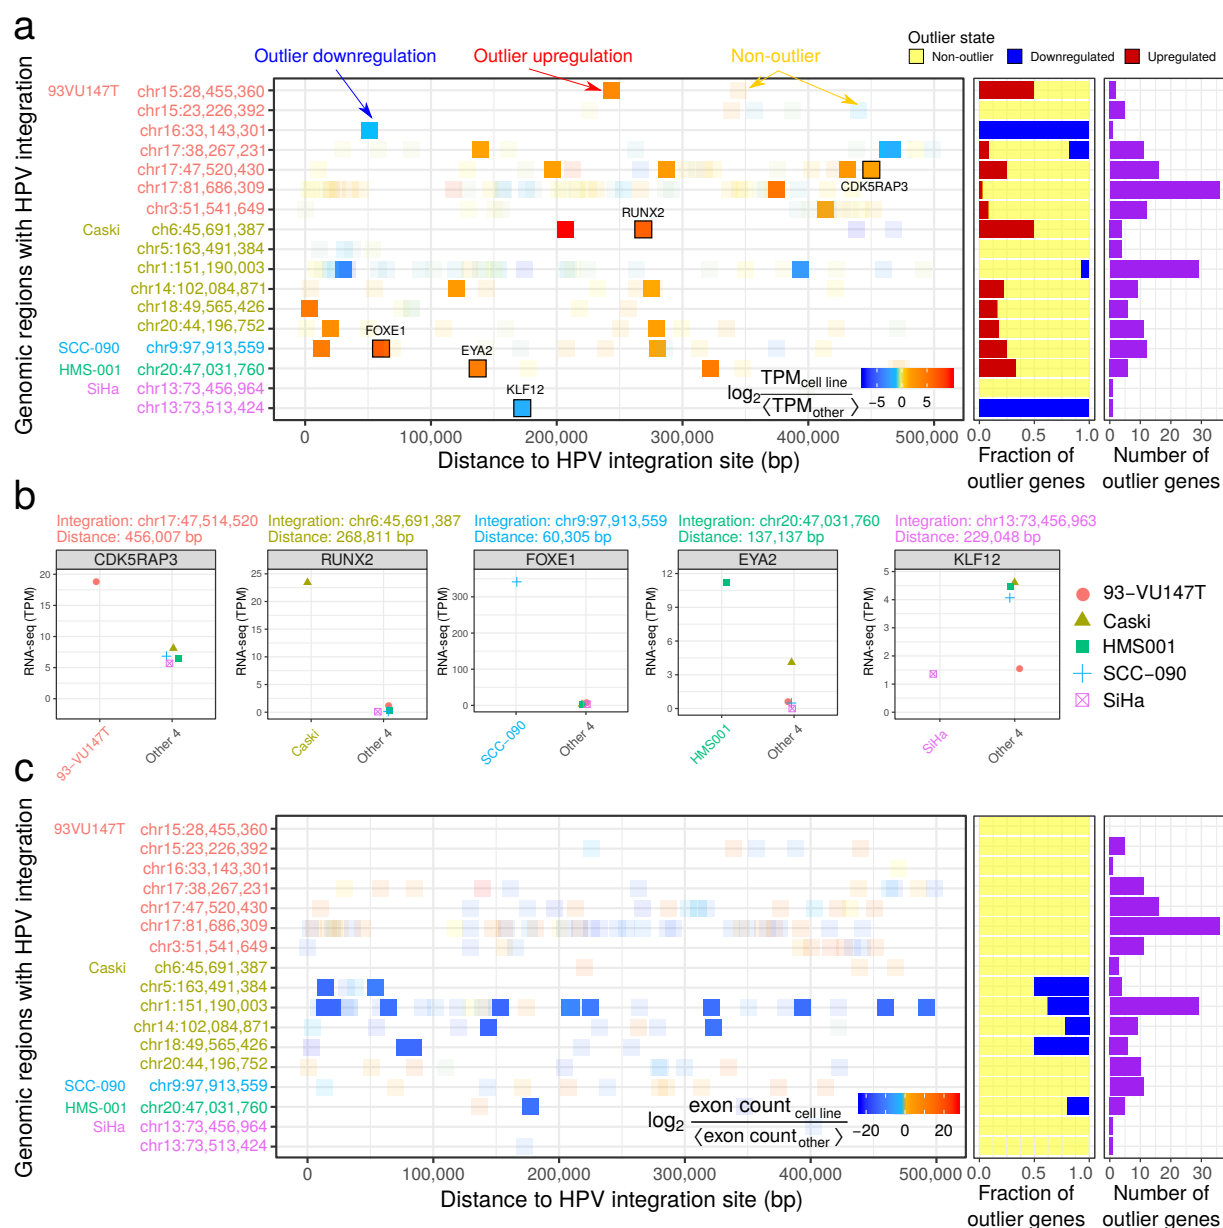

**Figure 4: HPV integration alters local transcription and splicing.** (a) (Left) Distances between 166 RefSeq genes within 500kbp of 17 HPV integration sites. Colour:  $\log_2$  TPM of the cell line with HPV integration divided by median TPM of the other 4 cell lines. Solid squares: 20 upregulated (red) and 4 downregulated (blue) outlier genes. Transparent squares: 140 genes without outlier change in gene expression. (Middle): Fraction of genes within 500kbp of each HPV integration site which are either non-outlier (yellow), downregulated (blue), or upregulated (red). We labeled one gene from each cell type and visualized their TPM in (b). (Right): number of genes within 500kbp of each HPV integration site. For the overlapping integration sites in SiHa, we showed each gene in only one row to avoid duplication. (b) Expression of one outlier gene from each of the 5 cell lines compared to the other 4 cell lines without HPV around the gene. (c) Similar to (a) but for differential exon usage of 159 Ensembl genes within 500kbp of 17 HPV integration sites. Colour: DEXSeq model fold change in exon count for the exon with the most extreme change in expression. Solid squares: 19 genes with DEXSeq  $q < 0.2$  and absolute exon fold change  $> 1$ . Transparent squares: 140 genes without outlier change in exon usage.



Instead of using the SD cutoff, here we conditioned on a statistical significance threshold of  $q < 0.2$ . HPV integration sites in Caski and SCC-090 displayed outlier expression of specific exons of genes within 500 kbp (Figure 4c). These results indicate that HPV integration can influence differential exon usage of neighbouring genes.

## 2.4 HPV modifies the epigenome and transcriptome within 100 kbp of integration sites

The dysregulation of gene expression and splicing near HPV integration sites may relate to altered chromatin structure. We investigated transcriptomic and epigenomic dysregulation upon HPV integration in the RNA-seq, ATAC-seq, and CTCF ChIP-seq data. At each integration site, we compared the genomic coverage of each assay for the cell line with HPV integration to the average in the other four cell lines:

$$\log_2 \frac{\text{RPM}_{\text{HPV}}}{\langle \text{RPM}_{\text{other}} \rangle}. \quad (4)$$

This allowed us to distinguish sample-specific variability from variations due to HPV integration.

We calculated RPM fold change (Equation 4) for all 10 kbp genomic windows around any HPV integration site. We calculated the same measurement for 10 random permutations of HPV integration sites. For each permutation, we moved the location of each HPV integration site in each cell line to a random integration site from another cell line, without replacement. We scrambled only the locations of the integration sites, leaving the assay data the same. For each assay, we conducted a two-sided t-test on the difference of RPM fold change in comparison of original versus permuted cell lines at every 10 kbp from the site of HPV integration. To control false discovery rate over multiple comparisons, we used the Benjamini-Hochberg method<sup>19</sup> to attain q-values<sup>20</sup> (Figure 5a).

RNA-seq, ATAC-seq, and CTCF ChIP-seq significantly differed between the original and permuted measurements up to 100 kbp from the HPV integration sites ( $q < 0.05$ ). HPV's effect size on transcription, chromatin accessibility, and CTCF binding diminished as distance from the HPV integration sites increased (Figure 5a).

We hypothesized that changes in epigenome and transcriptome occurred due to a specific feature of the integrated HPV, and would not just arise from any genomic insertion. Under this hypothesis, we expected that the integration of the 170 kbp EBV would not induce similar changes to HPV. Therefore, we investigated how the transcriptome and epigenome changed at the EBV integration sites of 4 lymphoblastoid cell lines: GM12873, GM12878, GM23248, and GM23338. Of these cell lines, ENCODE supplies all 3 of total RNA-seq data, DNase-seq data, and CTCF ChIP-seq data for only GM12878 and GM23338. To provide 3 experiments for each assay, we added total RNA-seq

Figure 5: (Next page). **HPV integration dysregulated the epigenome and transcriptome up to 100 kbp away.** (a) Difference in average RPM fold change in cell lines with HPV compared to 10 permuted controls. Symbol: measurement from RNA-seq (square), ATAC-seq (circle), and CTCF ChIP-seq (triangle) for a 10 kbp genomic bin. Colour: q-value of t-test comparing the cell line with HPV integration to 10 permutations; line: loess<sup>31</sup> regression model on data from RNA-seq (green), ATAC-seq (red), and CTCF ChIP-seq (blue). (b) Same as (a) but comparing GM12878 EBV integration sites to 2 other lymphoblastoid cell lines. (c) Complementary cumulative distribution function of number of outlier genes exceeding plotted absolute expression fold change  $\geq$  horizontal axis values and  $|\text{TPM}_{\text{HPV}} - \langle \text{TPM}_{\text{other}} \rangle| > 2\text{SD}$  Top: four HPV16<sup>+</sup> cell lines. Middle: HNSC patients. Bottom: CESC patients. Red: number of outlier genes in RNA-seq data; blue: mean number of outlier genes in 10 permutations of the samples; error bars: SD. (d) Similar to (c), but each showing the number of genes with absolute fold change in exon count  $> 1$  and DEXSeq  $q < 0.2$ .

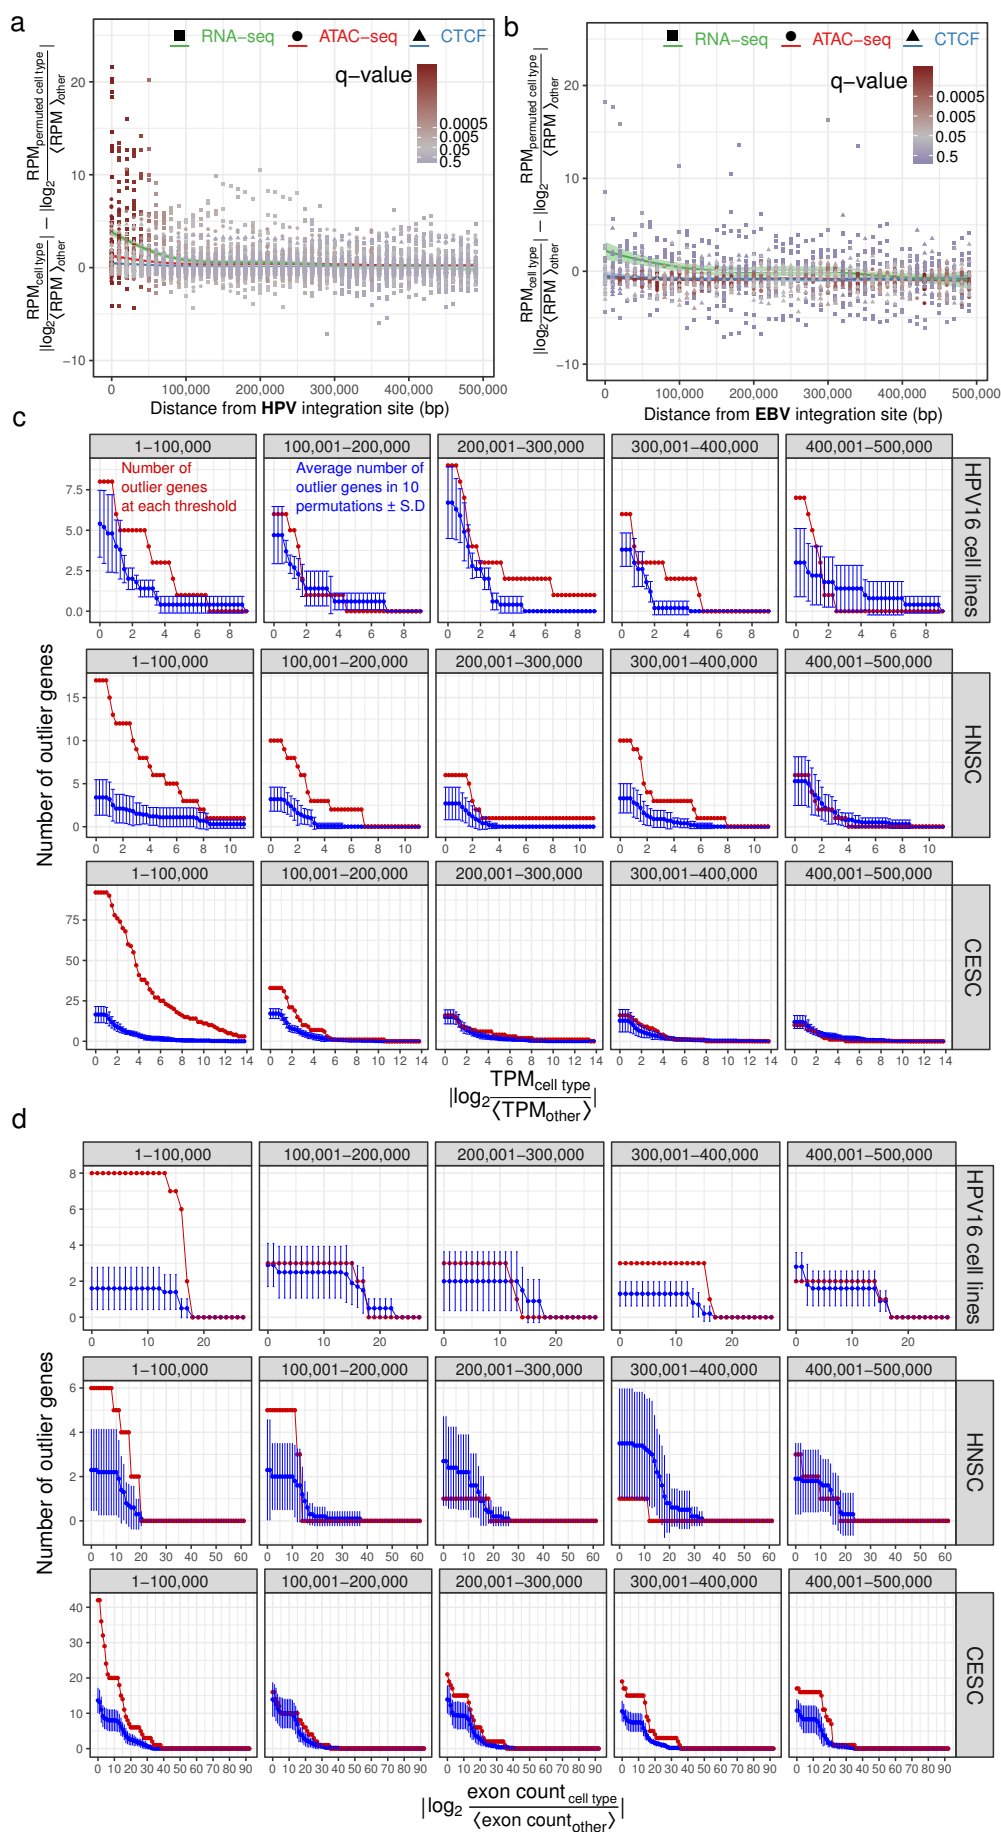

and DNA-seq data from GM23248 and CTCF ChIP-seq from GM12873. For each of the 3 assays, this allowed us to compare potential differences arising from EBV integration in GM12878 to 2 other EBV<sup>+</sup> lymphoblastoid cell lines (Figure 5b).

Unlike with HPV, we detected no significant difference in transcriptome or epigenome within 100 kbp of EBV integration sites (Figure 5b). We observed more transcription around EBV integration sites, but no statistically significant difference after correcting for multiple comparisons ( $q > 0.37$ ). GM12878 had less accessible chromatin and less CTCF binding compared to the other 2 lymphoblastoid cell lines when considering a larger region up to 500 kbp around EBV integration sites ( $q < 0.05$ ). The magnitude of change, however, was relatively modest (RPM fold change of as much as  $-4$ ) compared with the corresponding difference near HPV integration sites (RPM fold change of as much as 22) (Figure 5b).

### 2.4.1 HPV integration dysregulates the local transcriptome of HPV<sup>+</sup> carcinomas

Both cell lines derived from HNSC (93-VU147T, HMS-001, and SCC-090) and cell lines derived from CESC (Caski and SiHa) displayed epigenomic and transcriptomic changes near HPV integration sites. To investigate how often outlier gene expression occurs due to biological variation other than HPV integration, we permuted RNA-seq data for these 5 cell lines, for TCGA HNSC samples, and for TCGA CESC samples. In both the three original datasets and in 10 corresponding permuted datasets each, we examined genes at thresholds  $y$  of expression fold change separated by intervals of 0.25. We identified the genes with expression exceeding  $y$  where  $|\text{TPM}_{\text{HPV}} - \langle \text{TPM}_{\text{other}} \rangle| > 2\text{SD}$  (Figure 5c).

The original datasets contained more outlier genes passing a fold change cutoff of 2 compared to the 10 permuted controls. The greatest deviation of the original datasets compared to the permuted datasets occurred within the 100 kbp window of HPV integration. In the 5 cell lines examined, we detected 8 outlier genes within 100 kbp of HPV integration, but a mean of 5 outlier genes in the 10 permuted datasets. Among HNSC tumours, we identified 19 outlier genes, far greater than the mean of 4 outlier genes in the permuted HNSC controls. We also identified 90 outlier genes among CESC tumours—as opposed to a mean of 20 outlier genes within the permuted CESC controls.

We performed a similar permutation analysis to investigate whether differential exon usage occurs due to biological variations other than HPV integration (Figure 5d). Within 100 kbp of HPV integration, we consistently identified more genes with differential exon usage in the original datasets compared to permuted controls. In the 5 cell lines examined, we found 8 genes with differential exon usage, but only a mean of 2 genes with differential exon usage among the permuted controls. In these 8 genes, absolute  $\log_2$  exon count fold change (Equation 3) exceeded 13 ( $q < 0.2$ ). We found similar results for HNSC and CESC tumours.

## 2.5 HPV integration upregulates putative oncogenes

Having established that HPV integration results in changes in chromatin structure and dysregulated gene expression in cancer cell lines and patient tumours, we asked whether outlier expressed genes could play a driving role in tumorigenesis. We investigated the transcriptome of HPV<sup>+</sup> HNSC and CESC tumours in TCGA. Out of the 58 HNSC patients we examined, we found HPV integration sites in 26 of them by detecting transcribed chimeric sequences. Of these 26 patients, 16 (62%) displayed outlier expression of genes around HPV integration sites (Figure 6a). Among 295 CESC patients, 134 had transcribed chimeric sequences and therefore HPV integration sites. Of those 134 patients, 64 (48%) tumours displayed outlier expression of genes around HPV integration sites (Figure 6b).

Among the 5 cell lines, 16 HNSC tumours, and 64 CESC tumours, 231 genes in total showed outlier expression. Of these genes, 41 (18%) had Gene Ontology annotations<sup>32,33</sup> for transcription

factor DNA binding proteins ( $q = 0.002$ ; one-sided Fisher's exact test). HNSC patient TCGA-BA-5559, however, had an HPV integration at chr19:52,384,802, which disrupted the expression of 10 transcription factors with zinc finger domains (Figure 6a). Many genes with outlier expression around HPV integration sites, such as *NME1*<sup>34</sup>, *FOXA1*<sup>35</sup>, *BCL2*<sup>36</sup>, *KLF12*<sup>37</sup>, *FGF3*<sup>38</sup>, and *PBX1*<sup>39</sup> have previously reported roles in tumourigenesis.

Project Achilles<sup>40</sup> provides CRISPR-Cas9 screening data on the essentiality of 18,333 genes for the viability of 625 cancer cell lines. This includes 4 HPV<sup>+</sup> cell lines (SiHa, Caski, SISO<sup>41</sup>, and SCC-152<sup>24</sup>). These datasets report a CERES score for each gene, which quantifies its essentiality for cancer proliferation and survival<sup>40</sup>. Non-essential genes have a median CERES score of 0 and common core essential genes have a median CERES score of  $-1$ .

Among the 193 upregulated genes around the integration sites of 80 HPV<sup>+</sup> patient tumours, 188 genes had negative CERES scores. For each patient, we performed 10 random permutations on the identity of the genes around their HPV integration sites, replacing them with other genes upregulated specifically in that patient (expression fold change  $> 2$ ). Regardless of CERES score threshold used, we always found a higher number of upregulated essential genes in the original dataset than any of the permutation controls (Figure 6c). Also, more patient tumours had at least one upregulated essential gene around their HPV integration site, compared to randomly selected upregulated genes (Figure 6d).

### 3 Discussion

Several hypotheses can explain how HPV integration promotes tumourigenesis. Integration induces the expression of E6 and E7 either through disruption of the viral DNA-binding protein E2<sup>42</sup>, disruption of untranslated regions of E6 and E7<sup>42</sup>, or the creation of stable viral-host fusion transcripts<sup>43</sup>. Alternatively, certain integration sites may become genomically unstable, facilitating aberrant chromosomal rearrangements<sup>23</sup> or may activate the expression of transposable elements, particularly short interspersed nuclear elements (SINEs)<sup>44</sup>. Consistent with prior reports<sup>23,44,45</sup>, our results point to a separate mechanism whereby HPV integration leads to altered expression and splicing of neighbouring genes. Moreover, we identified active reorganization of local chromatin by CTCF binding to integrated HPV as a potential driver of local transcriptome dysregulation.

Figure 6: (Next page). **Outlier gene expression in HPV<sup>+</sup> patients.** (a) 26 TCGA HNSC patients with 3 strains integrated at 35 sites. Inner gray ring: each arc indicates a patient. Middle ring: individual HPV integration sites, with colour representing HPV strain. Outer ring: heatmap of expression of genes within 500 kbp of each integration site in the patient with HPV integration (peripheral) and 4 randomly selected patients without HPV integration around that gene (central). Red marks outside the heatmap: genes with outlier expression in the patient with HPV integration. Red gene symbols: genes with outlier expression. Blue gene symbols: genes with outlier expression and essential to viability (CERES score  $< -0.61$ ). (b) 134 TCGA CESC patients with 12 strains integrated at 208 sites. (c) Number of genes upregulated (absolute  $\log_2$  expression fold change  $> 1$ ) in any of 160 patients from (a) and (b), where the gene's CERES score  $<$  horizontal axis in at least one Project Achilles HPV<sup>+</sup> cell line. Red: upregulated genes within 500 kbp of HPV integration sites. Blue: randomly chosen upregulated genes from the same patients. Blue data point: median of 10 permutations. Error bars:  $\pm$ SD of 10 permutations. (d) Similar to (c), but instead the number of patients with at least one upregulated gene (absolute  $\log_2$  expression fold change  $> 1$ ), where the gene's CERES score  $<$  horizontal axis in at least one Project Achilles HPV<sup>+</sup> cell line.

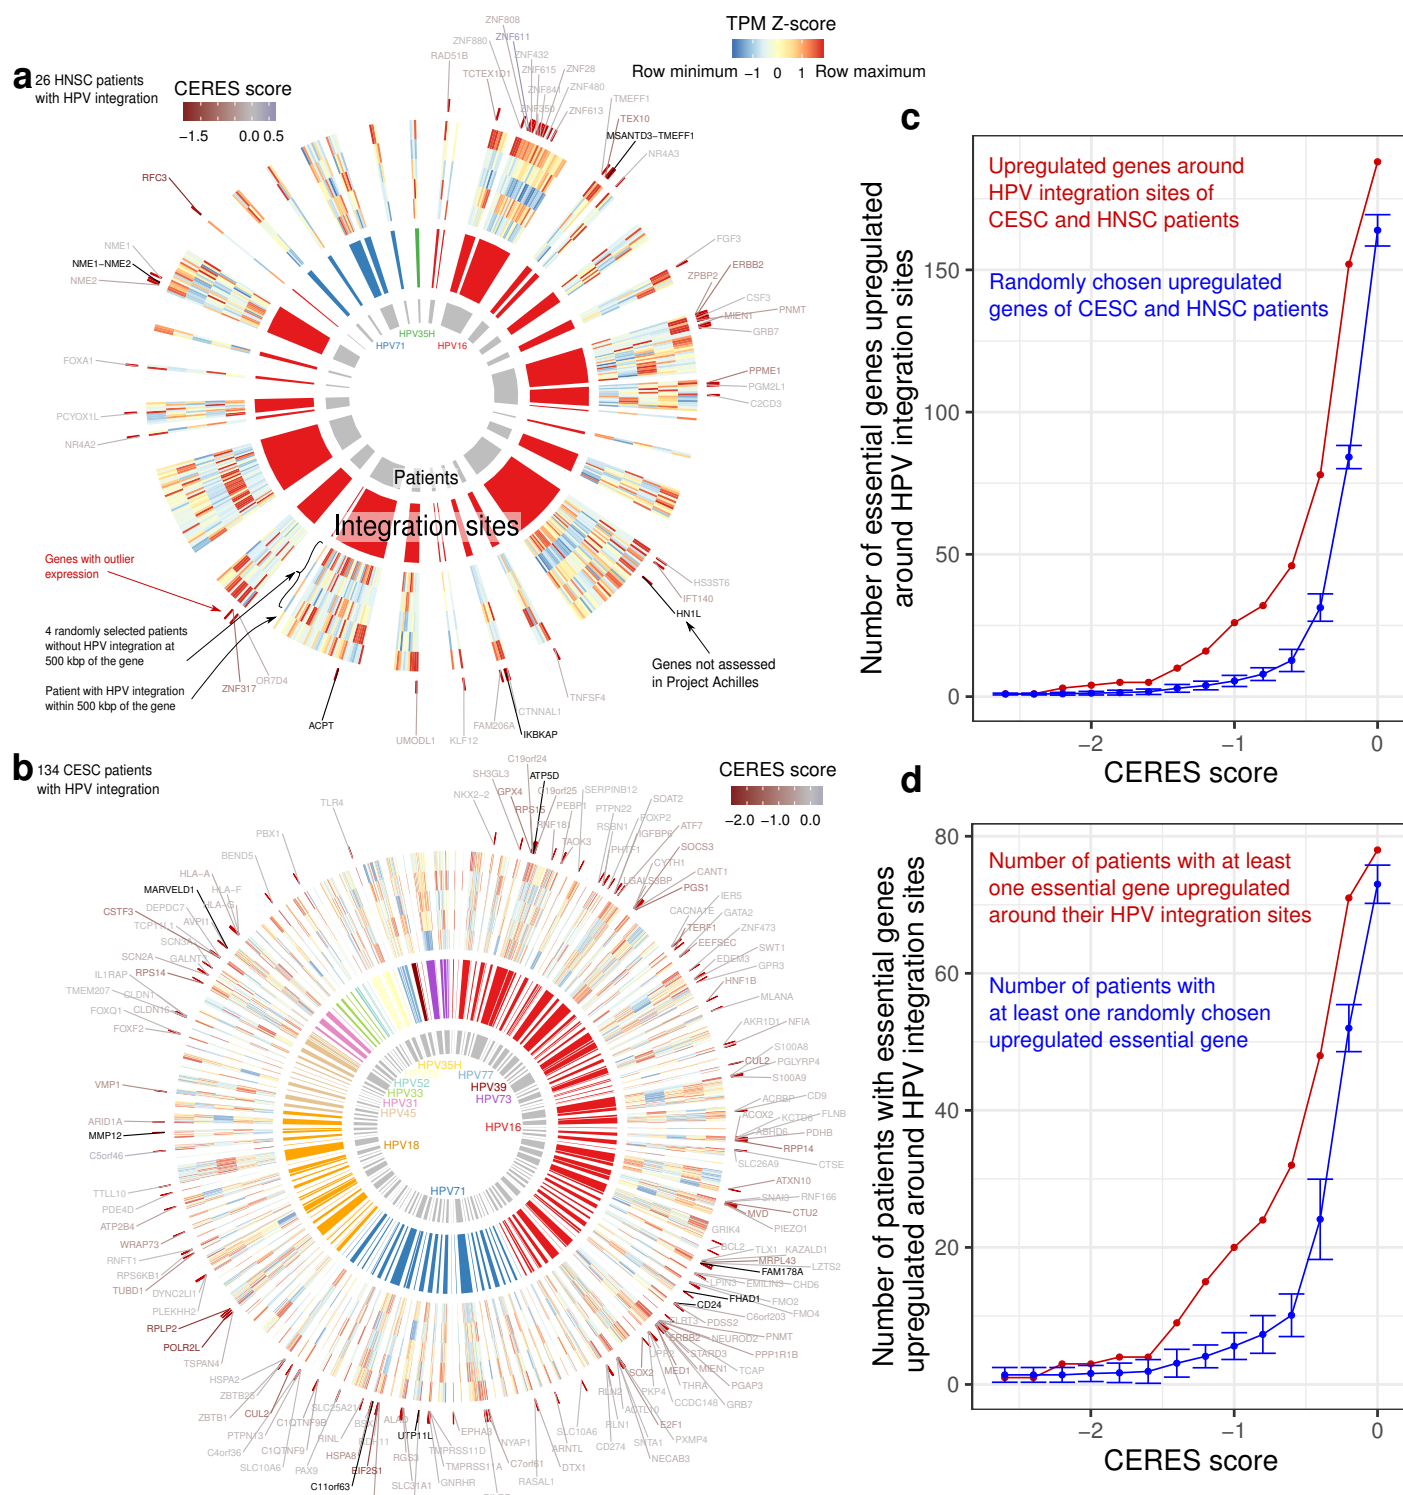



For the first time, we showed that HPV integration itself alters chromatin accessibility and the transcriptome in cell lines and patients. These changes may contribute to tumourigenesis by upregulating the expression of neighbouring genes, including some essential to tumour viability. In individual HPV integration sites, outlier expression of genes and changes in the epigenome occurred within 400 kbp of the integration. Examining integration sites in cell lines and patient tumours collectively uncovered significant chromatin, expression, and splicing differences within 100 kbp.

We identified a possible role for CTCF binding to integrated HPV in dysregulating the host chromatin and transcriptome. A conserved CTCF binding site distinguishes tumourigenic and non-tumourigenic HPVs<sup>7</sup>. In episomal HPV, knockout of this binding site enhances the expression of the E6 and E7 oncogenes<sup>8</sup>. A distinct role of the binding site in integrated HPV resolves this apparent paradox and explains its recurrence in tumourigenic strains.

Introduction of a new CTCF binding site by HPV may re-organize existing host topological domains. This can explain the extent of the changes in the chromatin and transcriptome seen here<sup>9</sup>. CTCF binding also plays a role in the life cycle of other DNA viruses, such as EBV and Kaposi's sarcoma-associated herpesvirus<sup>46</sup>. We showed here, however, EBV integration does not lead to significant changes in chromatin at integration sites—only HPV integration does. Our data agree with previous work showing that only some changes to CTCF binding sites alter chromosome conformation<sup>47,48</sup>.

We showed that HPV integration can increase the expression of neighbouring genes. We hypothesized that this, in turn, can predispose the host to tumour development. If true, the genomic position of the HPV integration site and the identity of its neighbouring genes should matter. Otherwise, we would expect HPV found in cancers integrated into genomic regions without any neighbouring oncogenes, since only a fraction of all genes can promote tumourigenesis. Reports on hotspot genomic regions in the host genome where HPV integrated<sup>23,44</sup> and upregulated oncogenes around HPV integration sites<sup>49</sup> support the hypothesis of increased local expression. The enrichment of HPV integration sites around genes and transposable elements, especially SINEs<sup>44</sup>, also supports this hypothesis.

If dysregulation of gene expression by HPV integration contributes to tumour development, we would expect to identify known oncogenes and master regulators of cancer-related pathways among the dysregulated genes in our analysis. We found that 41/231 outlier genes had the Gene Ontology annotation for transcription factor DNA binding proteins. Upregulated genes around HPV integration sites enriched among the most essential genes compared to upregulated genes distant from HPV integration sites.

Most of the tumours we examined had chimeric transcripts that pinpointed integration sites. Only investigating these integration sites eliminated the possibility of detecting false positive integration sites. This approach, however, can miss some true integration sites where one read of a pair maps completely to the virus and the other completely to the host. Future studies with targeted approaches such as Tagmentation-assisted Multiplex PCR Enrichment sequencing (TaME-seq) could identify HPV integration sites more exhaustively<sup>50</sup>.

Regardless of these limitations, our results show that integration of HPV induces changes in local chromatin of the host and the local transcriptome. We predicted that these changes contribute to tumourigenesis. Our results suggest that interactions between integrated HPV chromatin and host chromatin triggers these changes and that CTCF may play a key role in this process. Understanding the underlying mechanism of HPV–host chromatin interactions and their essentiality in tumourigenesis will better focus the future development of therapies for HPV<sup>+</sup> cancers.



## 4 Methods

### 4.1 Genome assembly, annotations, and data processing

We generated a chimeric genome assembly and RefSeq gene transfer format (GTF) annotation of GRCh38 from Illumina iGenomes ([https://support.illumina.com/sequencing/sequencing\\_software/igenome.html](https://support.illumina.com/sequencing/sequencing_software/igenome.html)) and the National Center for Biotechnology Information (NCBI) RefSeq HPV16 K02718.1 assembly<sup>51</sup>. The resulting chimeric FASTA file had all the GRCh38 chromosomes, unplaced and unlocalized contigs, chrM (mitochondrial genome), EBV, and one additional chromosome containing the entire K02718.1 sequence. The GTF file contained all the Illumina iGenomes GRCh38 annotations and additional rows annotating K02718.1 coding sequences. For all experiments, we trimmed Illumina TruSeq adapters from FASTQ files with Trim Galore (version 0.4.4, [https://www.bioinformatics.babraham.ac.uk/projects/trim\\_galore](https://www.bioinformatics.babraham.ac.uk/projects/trim_galore)).

For CTCF ChIP-seq, input control ChIP-seq, and ATAC-seq, we used Bowtie2<sup>52</sup> (version 2.2.6) with default parameters to align FASTQ files to the chimeric GRCh38-HPV16 genome. For RNA-seq, we used STAR (version 2.6.0c)<sup>53</sup>, specifying options `--outFilterMultimapNmax 2` `--genomeSAindexNbases 6` `--alignSJoverhangMin 8` `--alignSJDBoverhangMin 4` `--outFilterMismatchNoverReadLmax 0.05` to align the FASTQ files to the chimeric GRCh38-HPV16 genome.

### 4.2 RNA-seq

#### 4.2.1 Library preparation and sequencing

We prepared samples for RNA-seq using the TruSeq Stranded Total RNA Sample Preparation kit with RiboZero Gold (Illumina, San Diego, CA). We performed RNA sequencing for each sample to ~80 million paired-end 150 bp reads on an Illumina NextSeq 500 (Princess Margaret Genomics Centre, Toronto, ON). We collected input RNA using an AllPrep mini kit (Qiagen, Hilden, Germany).

#### 4.2.2 Bioinformatics analysis

We used StringTie<sup>54</sup> (version 1.3.3b) to quantify TPM for genes in the chimeric GRCh38 annotation. We used DEXSeq (version 1.28.1) for alternative isoform analysis<sup>30</sup>. For DEXSeq, we downloaded Ensembl genes version 94 for compatibility with the DEXSeq protocol<sup>55</sup>. For each gene, we compared each sample against all the other samples. We repeated these steps for cell lines, HNSC, and CESC patients.

We generated a list of the exons with the most extreme difference in expression according to the DEXSeq negative binomial generalized linear model for all the genes around HPV integration sites. We corrected the p-values for multiple testing using the Benjamini-Hochberg method<sup>19</sup> and used a cutoff of  $q < 0.2$  and minimum absolute fold change of 2 to select genes with alternative isoform expression.

### 4.3 CTCF ChIP-seq

#### 4.3.1 Library preparation

We prepared 10  $\mu$ L of both protein A and protein G beads through three washes of 5 mg/mL Dulbecco's phosphate-buffered saline (dPBS) + bovine serum albumin (BSA). We added 10  $\mu$ L of polyclonal CTCF antibody (Cat No. 2899, Lot 002, Cell Signalling Technology, Danvers, MA; [RRID:AB\\_2086794](#)) to the beads in 300  $\mu$ L dPBS + BSA and left it to bind for >6 h of rotation at 4 °C. After incubation, we washed the beads three more times with dPBS + BSA. Then, we

resuspended the beads in protease inhibitor (PI) and 100  $\mu$ L of modified radioimmunoprecipitation assay buffer (RIPA): 10 mmol/L Tris-HCl, pH 8.0; 1 mmol/L EDTA; 140 mmol/L NaCl; 1% volume fraction Triton X-100; 0.1% mass fraction SDS; 0.1% mass fraction sodium deoxycholate.

We trypsinized 1 million cells and then fixed for 10 min at room temperature in 300  $\mu$ L of dPBS + 1% volume fraction formaldehyde. We added 15  $\mu$ L of 2.5 mol/L glycine after fixing. Then, we washed the cells once in PBS + PI before resuspending them in 300  $\mu$ L of modified RIPA + PI. We sonicated the samples for 32 cycles of 30 s at full intensity using a Bioruptor Pico (Diagenode, Seraing, Belgium) and pelleted cell debris by spinning at 21,130  $\times$ g for 15 min. We set aside 15  $\mu$ L of the supernatant as an input control, and diluted the remaining supernatant with 1700  $\mu$ L of modified RIPA + PI and 100  $\mu$ L of washed beads. We incubated the samples at 4  $^{\circ}$ C overnight with rotation. We washed the beads with the following cold buffers in order: modified RIPA, modified RIPA + 500  $\mu$ mol/L NaCl, LiCl buffer (10 mmol/L Tris-HCl, pH 8.0; 1 mmol/L EDTA; 250 mmol/L LiCl; 0.5% mass NP-40; 0.5% mass sodium deoxycholate), and finally twice with TE buffer (pH 8.0). We resuspended the samples and inputs in 100  $\mu$ L of de-crosslinking buffer (1% volume fraction SDS, 0.1 mol/L NaHCO<sub>3</sub>) and incubated at 65  $^{\circ}$ C for 6 h. We cleaned the samples and inputs using the Monarch PCR & DNA clean-up kit (New England BioLabs, Ipswich, MA), prepared libraries using the ThruPLEX DNA-seq Kit (Rubicon Genomics, Ann Arbor, MI), and size selected to 240 bp–360 bp using a PippinHT 2% Agarose Cassette (Sage Science, Beverly, MA). For each sample, we sequenced three ChIP biological replicates and one input control to  $\sim$ 25 million single-end 50 bp reads each on an Illumina HiSeq 2000 (Princess Margaret Genomics Core, Toronto, ON).

### 4.3.2 Bioinformatics analysis

We used MACS2 (version 2.1.2) software<sup>56</sup> to identify peaks and generate fragment pileup data using default parameters plus `--nomodel --bdg`, and using input as control. We also generated a log fold change enrichment bedGraph file by comparing fragment pileup to the input control lambda file generated by MACS2.

We used FASTQC<sup>57</sup> (version 0.11.5) to assess the quality of ChIP-seq FASTQ files. After alignment with Bowtie2 and peak calling with MACS2, we used ChIPQC<sup>58</sup> (version 1.18.2) to assess enrichment quality. Input controls always had less than 0.7% fraction of reads in peaks, while ChIP experiments had an average of 9.4% fraction of reads in peaks (SD 6.4%). We merged the three replicates and found the following number of peaks passing a threshold of 5% **FDR! (FDR!)** and 5-fold enrichment over input control: 32,748 in 93-VU147T, 22,353 in Caski, 35,861 in HMS-001, 27,469 in SCC-090, and 37,161 in SiHa.

## 4.4 ATAC-seq

### 4.4.1 Library preparation and sequencing

We assessed open chromatin using OMNI-ATAC<sup>59</sup> followed by size selection to 100 bp–600 bp using a PippinHT 2% Agarose Cassette (Sage Science, Beverly, MA) and paired-end 125 bp sequencing on an Illumina HiSeq 2500 to a depth of  $\sim$ 60 million reads per sample (Princess Margaret Genomics Core, Toronto, ON).

### 4.4.2 Bioinformatics analysis

We used MACS2 (version 2.1.2) software<sup>56</sup> to identify peaks and generate fragment pileup data using default parameters and `--nomodel --shift -100 --extsize 200 --bdg --bampe`. For analysis of ATAC-seq peaks, we used a false discovery rate threshold of 5%.

To visualize the chromatin accessibility signal of multiple samples at HPV integration sites, we used the FPM measurement of each sample divided to the maximum FPM of that sample in the chromosome of HPV integration. This ensured all of the values ranged between 0 and 1 in that chromosome.

## 4.5 TCGA datasets and analysis

### 4.5.1 RNA-seq datasets

We downloaded GRCh37-aligned TCGA RNA-seq datasets for 295 CESC patients and 547 HNSC patients<sup>28</sup>. We extracted FASTQ files from the binary alignment map (BAM) files using bam2fastq (<https://gsl.hudsonalpha.org/information/software/bam2fastq>). We aligned the samples back to the chimeric GRCh38-HPV16 genome using STAR<sup>53</sup>.

We used StringTie<sup>54</sup> to quantify TPM for each of the experiments according to the chimeric GTF annotation of GRCh38 and HPV16. From the available 547 HNSC patients, we identified 58 as HPV<sup>+</sup>. We identified all of the 295 CESC patients as HPV<sup>+</sup>. We used DEXSeq for alternative isoform analysis<sup>30</sup>.

### 4.5.2 ATAC-seq datasets

For the 9 TCGA HNSC patients with ATAC-seq data, we downloaded GRCh38-aligned BAM files. We extracted FASTQ files from the BAM files using bam2fastq (version 1.1.0, <https://gsl.hudsonalpha.org/information/software/bam2fastq>), trimmed adapters and low-quality sequencing reads from the FASTQ files with Trim Galore, and aligned the samples back to the chimeric GRCh38-HPV16 genome using Bowtie2<sup>52</sup> (version 2.2.6). We used MACS2 (version 2.1.2) software<sup>56</sup> to identify peaks and generate fragment pileup data using default parameters and `--nomodel --shift -100 --extsize 200 --bdg --bampe`. For any analysis on ATAC-seq peaks, we used a false discovery rate threshold of 5%.

## 4.6 Identifying HPV strains

For HNSC and CESC patients, we mapped the sequencing reads to a reference genome of 189 HPV strains using Bowtie2<sup>52</sup> (version 2.2.6) with `--local`. We considered the HPV strain with the highest number of mapped reads as the *dominant strain*.

## 4.7 Identifying HPV integration sites

We developed Bellerophon to identify HPV integration sites with chimeric sequencing reads from any paired-end sequencing data. First, Bellerophon aligns reads to a viral genome. It allows for partial mapping using local alignment, and removes any sequencing fragment where neither read maps to the virus. Second, Bellerophon aligns the selected reads to the host genome, permitting partial mapping. Third, Bellerophon identifies *chimeric reads*: those reads mapped partially to the host genome and partially to the virus genome. Fourth, for each chimeric read, Bellerophon reports the start and strand of integration in both the host and viral genomes. Bellerophon also reports the number of chimeric reads supporting each integration site.

Bellerophon finds highly confident integration sites which contain chimeric sequencing reads. Other methods perform the first two steps in reverse order<sup>60</sup>, resulting in slower performance. While some previous methods also align to the virus first<sup>61</sup>, either the software no longer appears available where specified at publication<sup>62,63</sup>, or they use BLAST<sup>64,65</sup> instead of a faster short read aligner<sup>66</sup>. Unlike ViFi<sup>44</sup>, Bellerophon requires that the chimera match an existing viral genome reference.

Bellerophon does not use non-chimeric fragments where one read maps entirely to host and one read maps entirely to virus genome.

Bellerophon uses Bowtie2<sup>52</sup> (version 2.2.6) and vastly speeds up integration site finding. Bellerophon identified integration sites at an average of 8 core-hours on a 2.6 GHz Intel Xeon CPU E5-2650 v2 processor and 4 GB of RAM for whole genome sequencing data. Previous methods<sup>67</sup> require an average of 400 CPU core-hours.

We identified HPV integration sites in each sample using the sequence of the dominant HPV strain in that sample. We excluded any HPV integration site found in more than 1 patient to avoid overestimation of outliers at potential genomic hotspots of frequent integration<sup>23</sup>. In some cases, we found more than one HPV integration site in a 20 kbp window in one patient. Since we used RNA-seq for identifying our integration sites, some of these integration sites might occur as a result of splicing between the integrated HPV and neighbouring host genomic regions. To avoid over-representing genomic regions with multiple integration sites, we only used the integration site with the highest number of chimeric sequencing reads.

## Availability

Bellerophon catches chimeric sequences with a tale of Python. It is available at <https://github.com/hoffmangroup/bellerophon> and deposited at <https://doi.org/10.5281/zenodo.3633953>. We deposited our datasets for RNA-seq, ATAC-seq, and CTCF ChIP-seq of 5 HPV<sup>+</sup> cell lines in the Gene Expression Omnibus<sup>68</sup> (GEO accession: GSE143026) and other processed data at <https://doi.org/10.5281/zenodo.3662713>.

## Acknowledgments

We thank Jeff Bruce (ORCID: [0000-0002-6844-0286](https://orcid.org/0000-0002-6844-0286)) for his assistance in data access. We thank Carl Virtanen (ORCID: [0000-0002-2174-846X](https://orcid.org/0000-0002-2174-846X)) and Zhibin Lu (ORCID: [0000-0001-6281-1413](https://orcid.org/0000-0001-6281-1413)) (University Health Network High-Performance Computing Centre and Bioinformatics Core) for technical assistance. We thank Elana Fertig (ORCID: [0000-0003-3204-342X](https://orcid.org/0000-0003-3204-342X)) for providing histone modification ChIP-seq data for SCC-090. This work was supported by the Canadian Cancer Society (703827 to M.M.H.), Ontario Institute for Cancer Research Investigator Award (M.L.), the Princess Margaret Cancer Foundation with philanthropic support from the Joe and Cara Finley Centre for Head & Neck Cancer Research (S.V.B.) and the Gattuso-Slaight Personalized Cancer Medicine Fund (S.V.B. and M.M.H.), the Ontario Ministry of Training, Colleges and Universities (Ontario Graduate Scholarship to M.K.), the University of Toronto Faculty of Medicine Frank Fletcher Memorial Fund (M.K.), the Peterborough K.M. Hunter Charitable Foundation Graduate Award (M.K.), and the Parya Trillium Foundation Scholarship (M.K.).

## Competing interests

The authors declare that they have no competing interests.

## References

- [1] Catherine de Martel, Martyn Plummer, Jerome Vignat, and Silvia Franceschi. Worldwide burden of cancer attributable to HPV by site, country and HPV type. *International Journal of Cancer*, 141(4):664–670, 2017.
- [2] Davit Bzhalava, Carina Eklund, and Joakim Dillner. International standardization and classification of human papillomavirus types. *Virology*, 476:341–344, 2015.

- [3] Naoko Kajitani, Ayano Satsuka, Akifumi Kawate, and Hiroyuki Sakai. Productive life cycle of human papillomaviruses that depends upon squamous epithelial differentiation. *Frontiers in Microbiology*, 3:152, 2012.
- [4] Magnus von Knebel Doeberitz, Claudia Rittmüller, Harald Zur Hausen, and Matthias Dürst. Inhibition of tumorigenicity of cervical cancer cells in nude mice by HPV E6-E7 anti-sense RNA. *International Journal of Cancer*, 51(5):831–834, 1992.
- [5] Shiyu Song, Henry C. Pitot, and Paul F. Lambert. The human papillomavirus type 16 E6 gene alone is sufficient to induce carcinomas in transgenic animals. *Journal of Virology*, 73(7):5887–5893, 1999.
- [6] Mitsuo Yoshinouchi, Taketo Yamada, Masahiro Kizaki, Jin Fen, Takeyoshi Koseki, Yasuo Ikeda, Tatsuji Nishihara, and Kenji Yamato. *In vitro* and *in vivo* growth suppression of human papillomavirus 16-positive cervical cancer cells by E6 siRNA. *Molecular Therapy*, 8(5):762–768, 2003.
- [7] Christian Paris, Ieisha Pentland, Ian Groves, David C. Roberts, Simon J. Powis, Nicholas Coleman, Sally Roberts, and Joanna L. Parish. CCCTC-binding factor recruitment to the early region of the human papillomavirus 18 genome regulates viral oncogene expression. *Journal of Virology*, 89(9):4770–4785, 2015.
- [8] Ieisha Pentland, Karen Campos-León, Marius Cotic, Kelli-Jo Davies, C. David Wood, Ian J. Groves, Megan Burley, Nicholas Coleman, Joanne D. Stockton, Boris Noyvert, et al. Disruption of CTCF-YY1-dependent looping of the human papillomavirus genome activates differentiation-induced viral oncogene transcription. *PLoS Biology*, 16(10):e2005752, 2018.
- [9] Jesse R. Dixon, David U. Gorkin, and Bing Ren. Chromatin domains: the unit of chromosome organization. *Molecular Cell*, 62(5):668–680, 2016.
- [10] Michael H. Nichols and Victor G. Corces. A CTCF code for 3D genome architecture. *Cell*, 162(4):703–705, 2015.
- [11] Denes Hnisz, Abraham S. Weintraub, Daniel S. Day, Anne-Laure Valton, Rasmus O. Bak, Charles H Li, Johanna Goldmann, Bryan R. Lajoie, Zi Peng Fan, Alla A. Sigova, et al. Activation of proto-oncogenes by disruption of chromosome neighborhoods. *Science*, 351(6280):1454–1458, 2016.
- [12] Yu Amanda Guo, Mei Mei Chang, Weitai Huang, Wen Fong Ooi, Manjie Xing, Patrick Tan, and Anders Jacobsen Skanderup. Mutation hotspots at CTCF binding sites coupled to chromosomal instability in gastrointestinal cancers. *Nature Communications*, 9(1):1520, 2018.
- [13] Eric Minwei Liu, Alexander Martinez-Fundichely, Bianca Jay Diaz, Boaz Aronson, Tawny Cuykendall, Matthew MacKay, Priyanka Dhingra, Elissa W. P. Wong, Ping Chi, Effie Apostolou, et al. Identification of cancer drivers at CTCF insulators in 1,962 whole genomes. *Cell Systems*, 8(5):446–455, 2019.
- [14] Charles E. Grant, Timothy L. Bailey, and William S. Noble. FIMO: scanning for occurrences of a given motif. *Bioinformatics*, 27(7):1017–1018, 2011.
- [15] Thomas D. Schneider and R. Michael Stephens. Sequence logos: a new way to display consensus sequences. *Nucleic Acids Research*, 18(20):6097–6100, 1990.
- [16] Anthony Mathelier, Oriol Fornes, David J. Arenillas, Chih-yu Chen, Grgoire Denay, et al. JASPAR 2016: a major expansion and update of the open-access database of transcription factor binding profiles. *Nucleic Acids Research*, 44(D1):D110–115, 2016.
- [17] Cancer Genome Atlas Network. Comprehensive genomic characterization of head and neck squamous cell carcinomas. *Nature*, 517(7536):576, 2015.
- [18] Cancer Genome Atlas Research Network. Integrated genomic and molecular characterization of cervical cancer. *Nature*, 543(7645):378, 2017.
- [19] Yoav Benjamini and Yosef Hochberg. Controlling the false discovery rate: a practical and powerful approach to multiple testing. *Journal of the Royal Statistical Society: Series B (Methodological)*, 57(1):289–300, 1995.
- [20] John D. Storey. The positive false discovery rate: a bayesian interpretation and the q-value. *The Annals of Statistics*, 31(6):2013–2035, 2003.
- [21] Renske D. M. Steenbergen, Mario A. J. A. Hermsen, Jan M. M. Walboomers, Hans Joenje, Fré Arwert, Chris J. L. M. Meijer, and Peter J. F. Snijders. Integrated human papillomavirus type 16 and loss of heterozygosity at 11q22 and 18q21 in an oral carcinoma and its derivative cell line. *Cancer Research*, 55(22):5465–5471, 1995.
- [22] R. A. Pattillo, R. O. Hussa, M. T. Story, A. C. Ruckert, M. R. Shalaby, and R. F. Mattingly. Tumor antigen and human chorionic gonadotropin in CaSki cells: a new epidermoid cervical cancer cell line. *Science*, 196(4297):1456–1458, 1977.
- [23] Keiko Akagi, Jingfeng Li, Tatevik R. Broutian, Hesed Padilla-Nash, Weihong Xiao, Bo Jiang, James W. Rocco, Theodoros N. Teknos, Bhavna Kumar, Danny Wangsa, et al. Genome-wide analysis of HPV integration in human cancers reveals recurrent, focal genomic instability. *Genome Research*, 24(2):185–199, 2014.
- [24] Jason S. White, Joel L. Weissfeld, Camille C. R. Ragin, Karen M. Rossie, Christa Lese Martin, et al. The influence of clinical and demographic risk factors on the establishment of head and neck squamous cell carcinoma cell lines. *Oral Oncology*, 43(7):701–712, 2007.



- [25] Friz Friedl, Ikuo Kimura, Toyoro Osato, and Yohei Ito. Studies on a new human cell line (SiHa) derived from carcinoma of uterus. *Proceedings of the Society for Experimental Biology and Medicine*, 135(2):543–545, 1970.
- [26] A. Mincheva, Lutz Gissmann, and H. Zur Hausen. Chromosomal integration sites of human papillomavirus DNA in three cervical cancer cell lines mapped by in situ hybridization. *Medical Microbiology and Immunology*, 176(5):245–256, 1987.
- [27] Terri G. Edwards, Thomas J. Vidmar, Kevin Koeller, James K. Bashkin, and Chris Fisher. DNA damage repair genes controlling human papillomavirus (HPV) episome levels under conditions of stability and extreme instability. *PLoS One*, 8(10):e75406, 2013.
- [28] Ryan M. Corces, Jeffrey M. Granja, Shadi Shams, Bryan H. Louie, Jose A. Seoane, Wanding Zhou, Tiago C. Silva, Clarice Groeneveld, Christopher K. Wong, Seung Woo Cho, et al. The chromatin accessibility landscape of primary human cancers. *Science*, 362(420), 2018.
- [29] Sanjeev Shukla, Ersen Kavak, Melissa Gregory, Masahiko Imashimizu, Bojan Shutinoski, Mikhail Kashlev, Philipp Oberdoerffer, Rickard Sandberg, and Shalini Oberdoerffer. CTCF-promoted RNA polymerase II pausing links dna methylation to splicing. *Nature*, 479(7371):74, 2011.
- [30] Yafang Li, Xiayu Rao, William W. Mattox, Christopher I. Amos, and Bin Liu. RNA-seq analysis of differential splice junction usage and intron retentions by DEXSeq. *PLoS One*, 10(9):e0136653, 2015.
- [31] William S. Cleveland and Susan J. Devlin. Locally weighted regression: an approach to regression analysis by local fitting. *Journal of the American Statistical Association*, 83(403):596–610, 1988.
- [32] Michael Ashburner, Catherine A. Ball, Judith A. Blake, David Botstein, Heather Butler, et al. Gene ontology: tool for the unification of biology. *Nature Genetics*, 25(1):25, 2000.
- [33] Gene Ontology Consortium. The gene ontology resource: 20 years and still GOing strong. *Nucleic Acids Research*, 47(D1):D330–D338, 2018.
- [34] Jennifer A. Leary, Judith Kerr, Georgia Chenevix-Trench, Claire P. Doris, Terry Hurst, C. Roger S. Houghton, and Michael L. Friedlanders. Increased expression of the NME1 gene is associated with metastasis in epithelial ovarian cancer. *International Journal of Cancer*, 64(3):189–195, 1995.
- [35] Michael A. Augello, Theresa E. Hickey, and Karen E. Knudsen. FOXA1: master of steroid receptor function in cancer. *The EMBO Journal*, 30(19):3885–3894, 2011.
- [36] Anna Frenzel, Francesca Grespi, Waldemar Chmielewski, and Andreas Villunger. Bcl2 family proteins in carcinogenesis and the treatment of cancer. *Apoptosis*, 14(4):584–596, 2009.
- [37] Marie-Pier Tetreault, Yizeng Yang, and Jonathan P. Katz. Krüppel-like factors in cancer. *Nature Reviews Cancer*, 13(10):701, 2013.
- [38] Yuan-Wan Sun, Kun-Ming Chen, Yuka Imamura Kawasawa, Anna C. Salzberg, Timothy K. Cooper, Carla Caruso, Cesar Aliaga, Junjia Zhu, Krishne Gowda, Shantu Amin, et al. Hypomethylated Fgf3 is a potential biomarker for early detection of oral cancer in mice treated with the tobacco carcinogen dibenzo[def, p]chrysene. *PLoS One*, 12(10):e0186873, 2017.
- [39] Joon T. Park, Ie-Ming Shih, and Tian-Li Wang. Identification of Pbx1, a potential oncogene, as a Notch3 target gene in ovarian cancer. *Cancer Research*, 68(21):8852–8860, 2008.
- [40] Robin M. Meyers, Jordan G. Bryan, James M. McFarland, Barbara A. Weir, Ann E. Sizemore, Han Xu, Neekesh V. Dharra, Phillip G. Montgomery, Glenn S. Cowley, Sasha Pantel, et al. Computational correction of copy number effect improves specificity of CRISPR-Cas9 essentiality screens in cancer cells. *Nature Genetics*, 49(12):1779, 2017.
- [41] Kenzo Sonoda, Manabu Nakashima, Toshiaki Saito, Satoshi Amada, et al. Establishment of a new human uterine cervical adenocarcinoma cell-line, siso, and its reactivity to anticancer reagents. *International Journal of Oncology*, 6(5):1099–1104, 1995.
- [42] Saewha Jeon and Paul F. Lambert. Integration of human papillomavirus type 16 DNA into the human genome leads to increased stability of E6 and E7 mRNAs: implications for cervical carcinogenesis. *Proceedings of the National Academy of Sciences*, 92(5):1654–1658, 1995.
- [43] Nicolas Wentzensen, Ruediger Ridder, Ruediger Klaes, Svetlana Vinokurova, Ulrike Schaefer, and Magnus von Knebel Doeberitz. Characterization of viral-cellular fusion transcripts in a large series of HPV16 and 18 positive anogenital lesions. *Oncogene*, 21(3):419, 2002.
- [44] Nam-phuong D. Nguyen, Viraj Deshpande, Jens Luebeck, Paul S. Mischel, and Vineet Bafna. ViFi: accurate detection of viral integration and mRNA fusion reveals indiscriminate and unregulated transcription in proximal genomic regions in cervical cancer. *Nucleic Acids Research*, 46(7):3309–3325, 2018.
- [45] Nene N. Kalu, Tuhina Mazumdar, Shaohua Peng, Li Shen, Vaishnavi Sambandam, Xiayu Rao, et al. Genomic characterization of human papillomavirus-positive and -negative human squamous cell cancer cell lines. *Oncotarget*, 8(49):86369–86383, 2017.
- [46] Ieisha Pentland and Joanna L. Parish. Targeting CTCF to control virus gene expression: a common theme amongst diverse DNA viruses. *Viruses*, 7(7):3574–3585, 2015.



- [47] Darío G. Lupiáñez, Katerina Kraft, Verena Heinrich, Peter Krawitz, Francesco Brancati, Eva Klopocki, Denise Horn, Hülya Kayserili, John M. Opitz, Renata Laxova, et al. Disruptions of topological chromatin domains cause pathogenic rewiring of gene-enhancer interactions. *Cell*, 161(5):1012–1025, 2015.
- [48] Ahmet Rasim Barutcu, Philipp G. Maass, Jordan P. Lewandowski, Catherine L. Weiner, and John L. Rinn. A TAD boundary is preserved upon deletion of the CTCF-rich *Firre* locus. *Nature Communications*, 9(1444), 2018.
- [49] Hang Yuan, Ewa Krawczyk, Jan Blacato, Christopher Albanese, Dan Zhou, Naidong Wang, Siddhartha Paul, Faris Alkhilaiwi, Nancy Palechor-Ceron, Aleksandra Dakic, et al. HPV positive neuroendocrine cervical cancer cells are dependent on Myc but not E6/E7 viral oncogenes. *Scientific Reports*, 7:45617, 2017.
- [50] Sonja Lagström, Sinan Uğur Umu, Maija Lepistö, Pekka Ellonen, Roger Meisal, Irene Kraus Christiansen, Ole Herman Ambur, and Trine B Rounge. TaME-seq: An efficient sequencing approach for characterisation of HPV genomic variability and chromosomal integration. *Scientific Reports*, 9(1):524, 2019.
- [51] Iain M. Kennedy, Jeanette K. Haddow, and J. Barklie Clements. A negative regulatory element in the human papillomavirus type 16 genome acts at the level of late mRNA stability. *Journal of Virology*, 65(4):2093–2097, 1991.
- [52] Ben Langmead and Steven L. Salzberg. Fast gapped-read alignment with Bowtie 2. *Nature Methods*, 9(4):357, 2012.
- [53] Alexander Dobin, Carrie A. Davis, Felix Schlesinger, Jorg Drenkow, Chris Zaleski, Sonali Jha, Philippe Batut, Mark Chaisson, and Thomas R. Gingeras. STAR: ultrafast universal RNA-seq aligner. *Bioinformatics*, 29(1):15–21, 2013.
- [54] Mihaela Pertea, Geo M. Pertea, Corina M. Antonescu, Tsung-Cheng Chang, Joshua T. Mendell, and Steven L. Salzberg. StringTie enables improved reconstruction of a transcriptome from RNA-seq reads. *Nature Biotechnology*, 33(3):290, 2015.
- [55] Fiona Cunningham, Premanand Achuthan, Wasiu Akanni, James Allen, et al. Ensembl 2019. *Nucleic Acids Research*, 47(D1):D745–D751, 2019.
- [56] Yong Zhang, Tao Liu, Clifford A. Meyer, Jérôme Eeckhoute, et al. Model-based analysis of ChIP-Seq (MACS). *Genome Biology*, 9(9):R137, 2008.
- [57] Simon Andrews, Felix Krueger, Anne Segonds-Pichon, Laura Biggins, Christel Krueger, and Steven Wingett. FastQC. Babraham Institute, January 2012.
- [58] Thomas S. Carroll, Ziwei Liang, Rafik Salama, Rory Stark, and Ines de Santiago. Impact of artifact removal on ChIP quality metrics in ChIP-seq and ChIP-exo data. *Frontiers in Genetics*, 5:75, 2014.
- [59] M. Ryan Corces, Alexandro E. Trevino, Emily G. Hamilton, Peyton G. Greenside, Nicholas A. Sinnott-Armstrong, Sam Vesuna, Ansuman T. Satpathy, Adam J. Rubin, Kathleen S. Montine, Beijing Wu, et al. An improved ATAC-seq protocol reduces background and enables interrogation of frozen tissues. *Nature Methods*, 14(10):959, 2017.
- [60] Xun Chen, Jason Kost, Arvis Sulovari, Nathalie Wong, Winnie S. Liang, Jian Cao, and Dawei Li. A virome-wide clonal integration analysis platform for discovering cancer viral etiology. *Genome Research*, 29(5):819–830, 2019.
- [61] Xun Chen, Jason Kost, and Dawei Li. Comprehensive comparative analysis of methods and software for identifying viral integrations. *Briefings in Bioinformatics*, 20(6):2088–2097, 2019.
- [62] Daniel W. H. Ho, Karen M. F. Sze, and Irene O. L. Ng. Virus-Clip: a fast and memory-efficient viral integration site detection tool at single-base resolution with annotation capability. *Oncotarget*, 6(25):20959, 2015.
- [63] Jing-Woei Li, Raymond Wan, Chi-Shing Yu, Ngai Na Co, Nathalie Wong, and Ting-Fung Chan. ViralFusionSeq: accurately discover viral integration events and reconstruct fusion transcripts at single-base resolution. *Bioinformatics*, 29(5):649–651, 2013.
- [64] Stephen F. Altschul, Warren Gish, Webb Miller, Eugene W. Myers, and David J. Lipman. Basic local alignment search tool. *Journal of Molecular Biology*, 215(3):403–410, 1990.
- [65] Stephen F. Altschul, Thomas L. Madden, Alejandro A. Schäffer, Jinghui Zhang, Zheng Zhang, Webb Miller, and David J. Lipman. Gapped BLAST and PSI-BLAST: a new generation of protein database search programs. *Nucleic Acids Research*, 25(17):3389–3402, 1997.
- [66] Chandana Tennakoon and Wing Kin Sung. BATVI: fast, sensitive and accurate detection of virus integrations. *BMC Bioinformatics*, 18(3):71, 2017.
- [67] Qingguo Wang, Peilin Jia, and Zhongming Zhao. VERSE: a novel approach to detect virus integration in host genomes through reference genome customization. *Genome Medicine*, 7(1):2, 2015.
- [68] Ron Edgar, Michael Domrachev, and Alex E. Lash. Gene Expression Omnibus: NCBI gene expression and hybridization array data repository. *Nucleic Acids Research*, 30(1):207–210, 2002.
